# Supplementary material
Source: Springer Nature journal article supplement (https://www.springermedizin.de/resource/supplementary/12943_2014_1387_MOESM14_ESM.pdf/9552862)

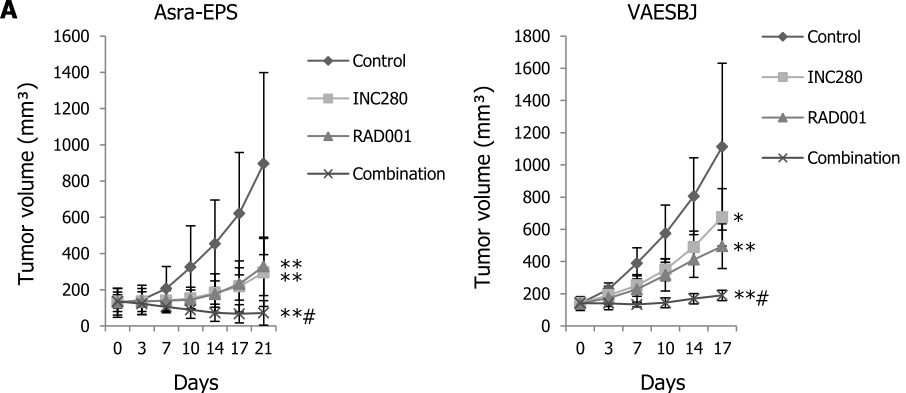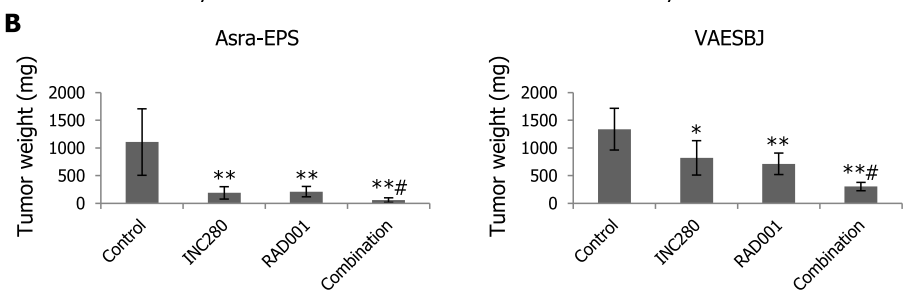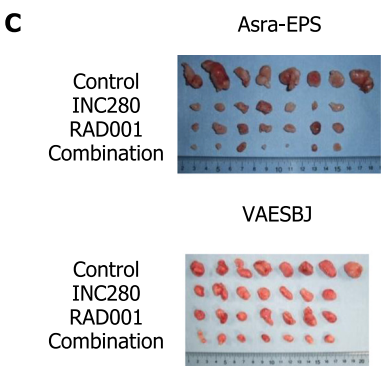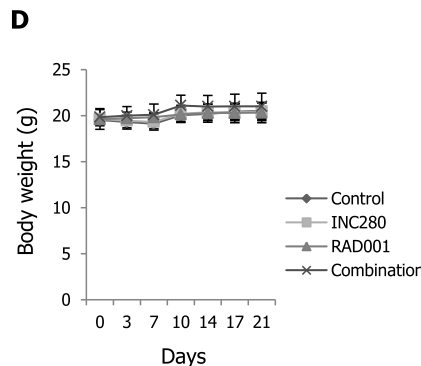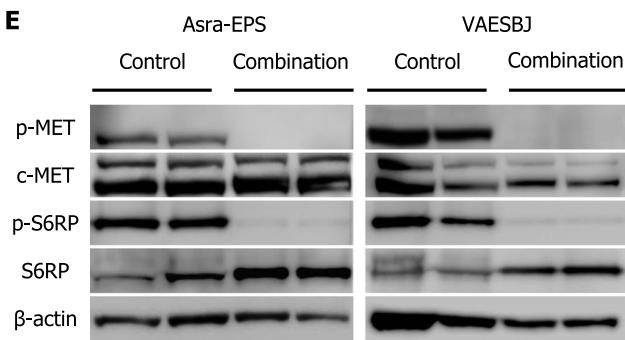

Supplement: MOESM14 [file 9552862]
